# Supplementary material for: Facile One-Pot Green Synthesis of Magneto-Luminescent Bimetallic Nanocomposites with Potential as Dual Imaging Agent
Source: MDPI journal article supplement (doi:10.3390/nano13061027), 2023-03-13
Supplement: s1 [file s1]

## Supplementary Materials

# Facile One-Pot Green Synthesis of Magneto-Luminescent Bimetallic Nanocomposites with Potential as Dual Imaging Agent

Radek Ostruszka <sup>1</sup>, Denisa Půlpánová <sup>2</sup>, Tomáš Pluháček <sup>3</sup>, Ondřej Tomanec <sup>4</sup>, Petr Novák <sup>1</sup>, Daniel Jiráček <sup>2,5</sup> and Karolína Šišková <sup>1,\*</sup>

<sup>1</sup> Department of Experimental Physics, Faculty of Science, Palacký University Olomouc, 77900 Olomouc, Czech Republic

<sup>2</sup> Faculty of Health Studies, Technical University of Liberec, 46117 Liberec, Czech Republic

<sup>3</sup> Department of Analytical Chemistry, Faculty of Science, Palacký University Olomouc, 77900 Olomouc, Czech Republic

<sup>4</sup> Regional Centre of Advanced Technologies and Materials, Czech Advanced Technology and Research Institute, Palacký University Olomouc, 77900 Olomouc, Czech Republic

<sup>5</sup> Radiodiagnostic and Interventional Radiology Department, Institute for Clinical and Experimental Medicine, 14021 Prague, Czech Republic

\* Correspondence: karolina.siskova@upol.cz

**Keywords:** Nanocomposite materials; Gold nanoclusters; Luminescence materials; MRI assessment; SPION; bovine serum albumin.

### Table of contents:

1. 3D-fluorescence maps and average quantum yield determination of AuBSA and AuBSA-Fe (pages 2-3)
2. Particle size distribution determined by DLS (pages 4-6)
3. ICP-MS method validation, determination of Au and Fe concentrations (pages 7-8)
4. MRI for AuBSA-Fe samples (page 9-11)
5. Ageing and recommended storage conditions of AuBSA-Fe samples as verified by XPS measurements (pages 12-17)
6. Cell viability tests (page 18)

1. 3D-fluorescence maps and average quantum yield determination of AuBSA and AuBSA-Fe

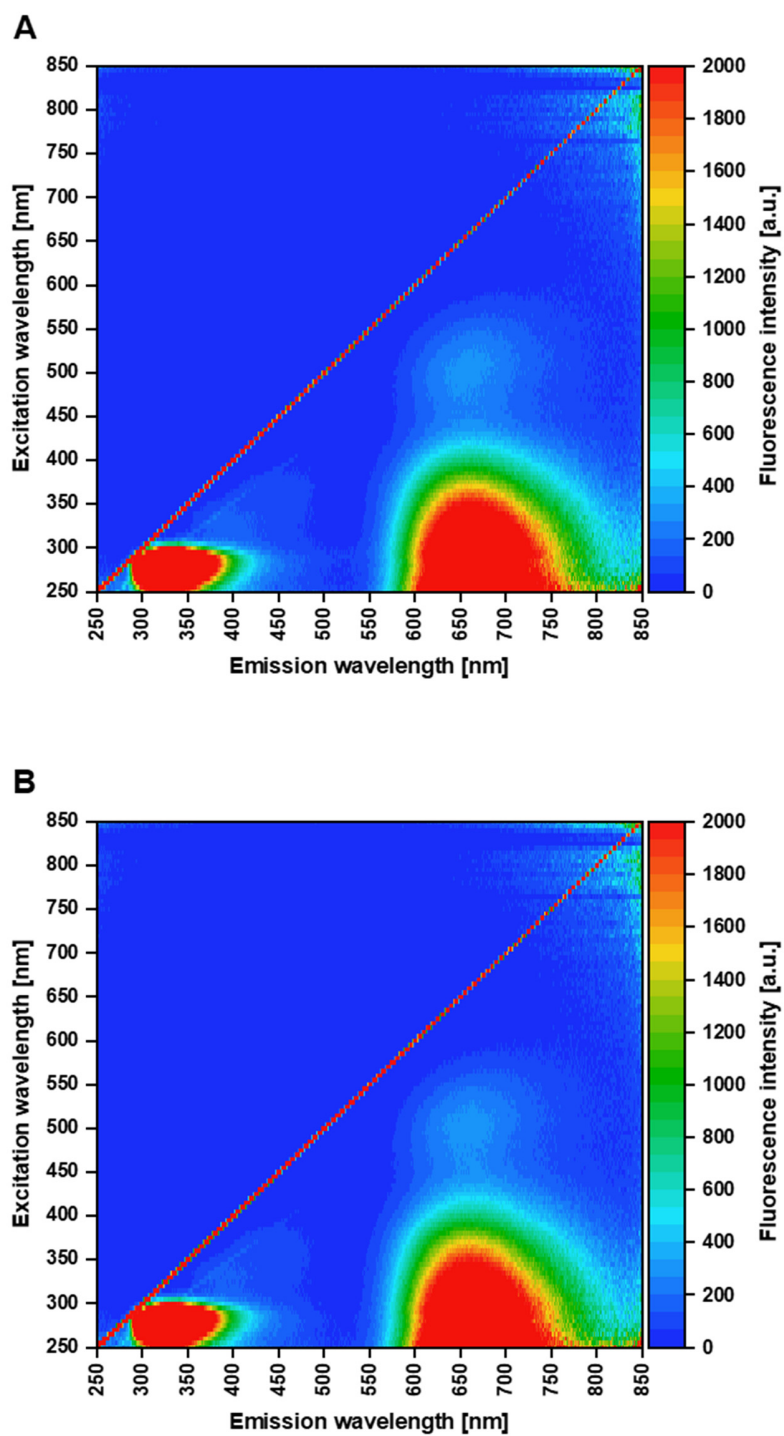

**Figure S1.** 3D excitation-emission maps of AuBSA (A) and AuBSA-Fe (B).

**Table S1.** Quantum yield and position of emission maxima of AuBSA (7 independent sample preparations).

| <b>AuBSA</b>             | <b>I</b> | <b>II</b> | <b>III</b> | <b>IV</b> | <b>V</b> | <b>VI</b> | <b>VII</b> | <b>Average</b> | <b>SD</b> |
|--------------------------|----------|-----------|------------|-----------|----------|-----------|------------|----------------|-----------|
| <b>Absorbance</b>        | 0.0196   | 0.0211    | 0.0204     | 0.0207    | 0.0205   | 0.0205    | 0.0206     | 0.0205         | 0.0005    |
| <b>Quantum yield [%]</b> | 6.4      | 6.1       | 6.4        | 6.4       | 6.4      | 6.5       | 6.4        | 6.4            | 0.1       |
| <b>Maximum at [nm]</b>   | 659      | 654       | 656        | 656       | 658      | 659       | 656        | 657            | 2         |

**Table S2.** Quantum yield and position of emission maxima of AuBSA-Fe (7 independent sample preparations).

| <b>AuBSA-Fe</b>          | <b>I</b> | <b>II</b> | <b>III</b> | <b>IV</b> | <b>V</b> | <b>VI</b> | <b>VII</b> | <b>Average</b> | <b>SD</b> |
|--------------------------|----------|-----------|------------|-----------|----------|-----------|------------|----------------|-----------|
| <b>Absorbance</b>        | 0.0197   | 0.0202    | 0.0205     | 0.0200    | 0.0201   | 0.0207    | 0.0204     | 0.0202         | 0.0003    |
| <b>Quantum yield [%]</b> | 6.5      | 6.1       | 6.1        | 6.3       | 6.2      | 6.0       | 6.2        | 6.2            | 0.2       |
| <b>Maximum at [nm]</b>   | 658      | 655       | 656        | 655       | 656      | 655       | 658        | 656            | 1         |

## 2. Particle size distribution determined by DLS

Particle size distribution (PSD) within a liquid sample can be determined by dynamic light scattering (DLS), i.e., by measuring changes of the scattered light intensity as a function of time. The instrument (Zetasizer Malvern) enables to determine PSD based on intensity, number, and volume. The former is the only value, which is measured experimentally; the two others are calculated from the former under certain assumptions (spherical, isolated, identical particles). Average PSD histograms of AuBSA and AuBSA-Fe nanocomposites are shown in Figure SI-2 for the sake of a direct comparison and for explanation of polydispersity (PDI) increase in AuBSA-Fe in comparison to AuBSA as shown and discussed in the main text. However, keep in mind that contents of big particles in PSD based on intensity changes of scattered light are overestimated because the bigger particles, the higher contribution of their scattering.

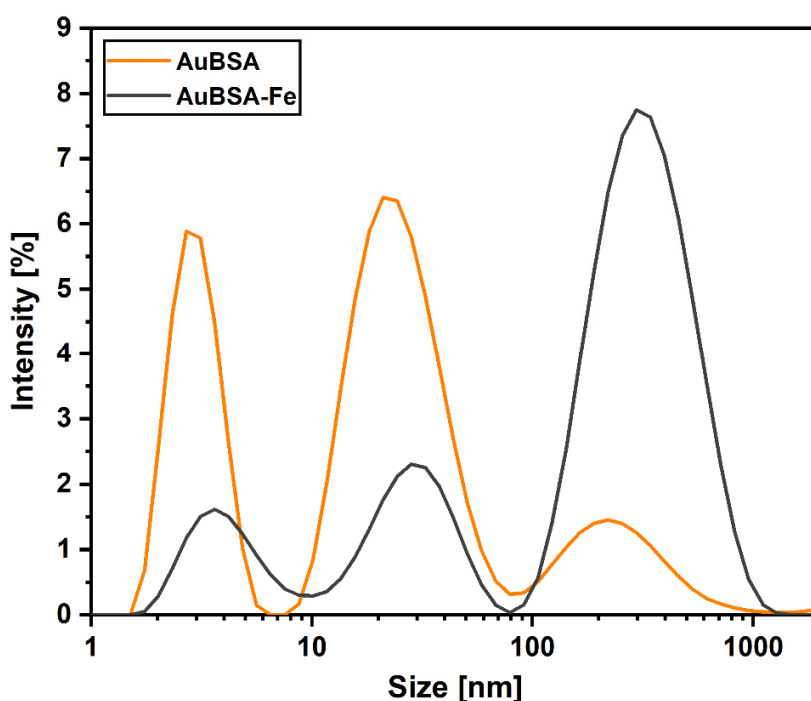

**Figure S2.** Particle size distribution (PSD) histograms of AuBSA (orange curve) and AuBSA-Fe (black curve) based on the changes in intensity of scattered light (633 nm laser line) measured by dynamic light scattering. Trimodal PSD is observed in both samples, however, with different average values and percentage (in brackets):  $266.1 \pm 38.0$  nm ( $12.9 \pm 2.1$  %),  $26.8 \pm 2.4$  nm ( $50.8 \pm 1.2$  %),  $3.0 \pm 0.1$  nm ( $27.7 \pm 0.8$  %) for AuBSA;  $351.2 \pm 21.0$  nm ( $68.7 \pm 1.4$  %),  $30.0 \pm 2.9$  nm ( $16.7 \pm 0.9$  %),  $4.4 \pm 0.3$  nm ( $10.6 \pm 0.8$  %) for AuBSA-Fe.

Three different types of NP sizes are thus present in both aqueous systems AuBSA and AuBSA-Fe (representing proper solutions, i.e., without any aggregates visible by naked eyes): several units, tens, and hundreds of nanometers, which well explains the relatively large PDI values. Obviously, there is a more significant contribution of the largest particles (around 351 nm in average) in PSD of AuBSA-Fe in comparison to PSD of AuBSA (Figure SI-2). However, their sizes

are still in hundreds of nanometers, which means that these nanoparticles could be internalized by cells (which are 10-100  $\mu\text{m}$  in size for most animal and plant cells).

Reproducibility of PSD data is demonstrated in Figures SI-3 and SI-4 and in Tables SI-3 and SI-4. By assuming spherical isolated particles, PSD based on number can be also calculated as seen in Tables SI-3 and SI-4. However, it should be reminded that PSD based on particle number is the calculated value obtained under the above-mentioned assumptions of identical, spherical, isolated particles.

**Table S3.** PSD of several independently measured AuBSA samples determined by DLS based on intensity (Int) and number (Num). Average and standard deviation (SD) values are then calculated.

| AuBSA   | Int 1<br>[nm] | Int 2<br>[nm] | Int 3<br>[nm] | Num 1<br>[nm] | Area<br>Int 1<br>[%] | Area<br>Int 2<br>[%] | Area<br>Int 3<br>[%] | Area<br>Num 1<br>[%] | Z-Average<br>[nm] | PDI   |
|---------|---------------|---------------|---------------|---------------|----------------------|----------------------|----------------------|----------------------|-------------------|-------|
| I       | 243.6         | 26.4          | 3.0           | 2.2           | 13.1                 | 52.6                 | 27.9                 | 100.0                | 42.86             | 0.236 |
| II      | 246.2         | 25.0          | 2.9           | 2.2           | 12.0                 | 50.7                 | 27.7                 | 100.0                | 16.08             | 0.438 |
| III     | 303.3         | 27.1          | 3.0           | 2.3           | 13.4                 | 49.5                 | 27.8                 | 100.0                | 21.15             | 0.389 |
| IV      | 227.2         | 24.9          | 3.0           | 2.2           | 10.1                 | 49.9                 | 28.7                 | 100.0                | 20.62             | 0.327 |
| V       | 310.4         | 30.8          | 3.2           | 2.4           | 15.9                 | 51.3                 | 26.5                 | 100.0                | 18.92             | 0.494 |
| Average | 266.1         | 26.8          | 3.0           | 2.3           | 12.9                 | 50.8                 | 27.7                 | 100.0                | 23.9              | 0.4   |
| SD      | 38.0          | 2.4           | 0.1           | 0.1           | 2.1                  | 1.2                  | 0.8                  | 0.0                  | 10.8              | 0.1   |

**Table S4.** PSD of several independently measured AuBSA-Fe determined by DLS based on intensity (Int) and number (Num). Average and standard deviation (SD) values are then calculated.

| AuBSA-Fe | Int 1<br>[nm] | Int 2<br>[nm] | Int 3<br>[nm] | Num 1<br>[nm] | Area<br>Int 1<br>[%] | Area<br>Int 2<br>[%] | Area<br>Int 3<br>[%] | Area<br>Num 1<br>[%] | Z-Average<br>[nm] | PDI   |
|----------|---------------|---------------|---------------|---------------|----------------------|----------------------|----------------------|----------------------|-------------------|-------|
| I        | 361.2         | 34.4          | 4.7           | 2.2           | 67.7                 | 17.2                 | 11.2                 | 100.0                | 83.61             | 1.000 |
| II       | 331.5         | 26.8          | 4.2           | 2.8           | 70.3                 | 15.4                 | 9.8                  | 100.0                | 71.59             | 1.000 |
| III      | 382.3         | 30.4          | 3.9           | 2.6           | 68.8                 | 17.8                 | 9.8                  | 100.0                | 71.28             | 1.000 |
| IV       | 334.1         | 28.5          | 4.6           | 2.5           | 67.0                 | 16.4                 | 11.3                 | 100.0                | 68.13             | 1.000 |
| V        | 347.0         | 30.0          | 4.5           | 2.4           | 69.8                 | 16.9                 | 11.1                 | 100.0                | 61.61             | 1.000 |
| Average  | 351.2         | 30.0          | 4.4           | 2.5           | 68.7                 | 16.7                 | 10.6                 | 100.0                | 71.2              | 1.0   |
| SD       | 21.0          | 2.9           | 0.3           | 0.2           | 1.4                  | 0.9                  | 0.8                  | 0.0                  | 8.0               | 0.0   |

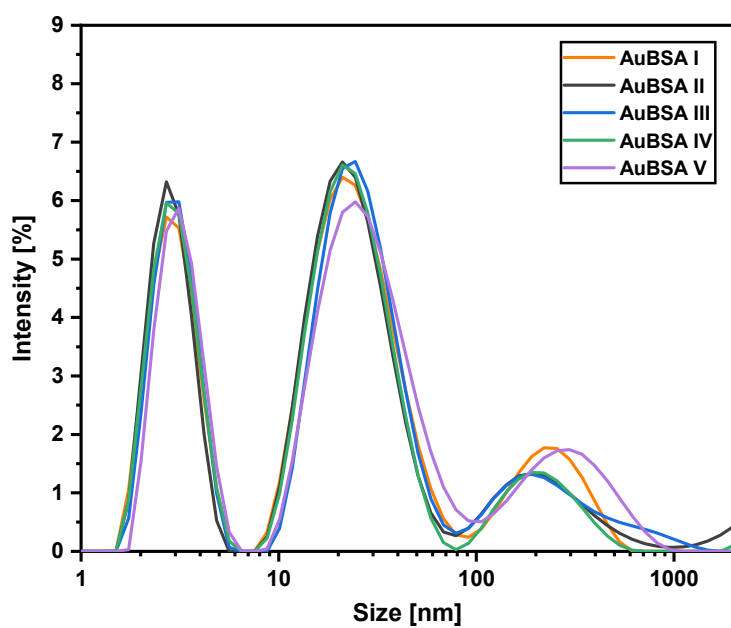

**Figure S3.** Histograms of PSD of several independently measured AuBSA.

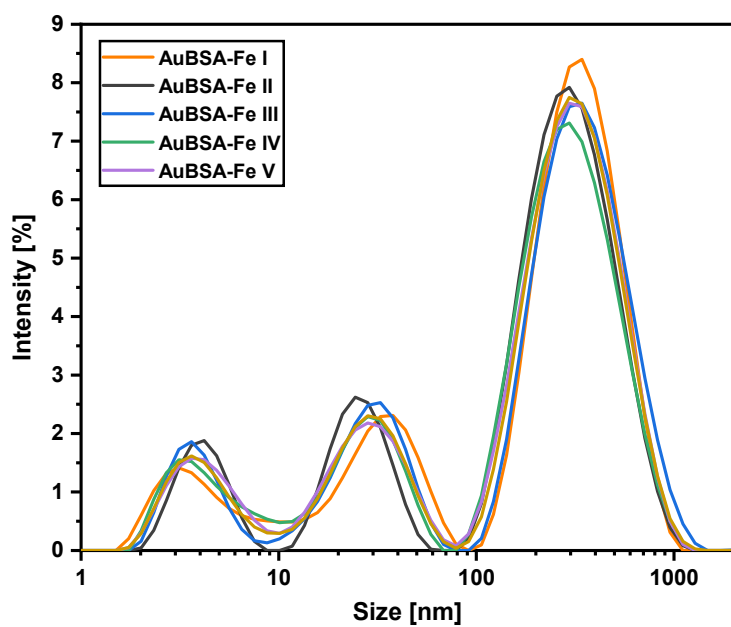

**Figure S4.** Histograms of PSD of several independently measured AuBSA-Fe.

### 3. ICP-MS method validation and determination of Au and Fe concentrations

The total gold and iron concentrations were determined by an Agilent 7700x ICP-MS (Agilent Technologies Ltd., Japan) fitted with ASX-520 autosampler, MicroMist concentric nebulizer, a Scott-type double pass spray chamber, and an octopole reaction system working in helium mode was used for all analyses. The optimized ICP-MS operating conditions were as follows: RF power of 1550 W, plasma gas flow rate of 15.0 L·min<sup>-1</sup>, an auxiliary gas flow rate of 0.9 L·min<sup>-1</sup>, nebulizer gas flow rate of 1.05 L·min<sup>-1</sup>, collision gas He flow rate of 4.3 mL·min<sup>-1</sup> and a dwell time of 100 ms for <sup>56</sup>Fe, <sup>197</sup>Au, <sup>45</sup>Sc, <sup>209</sup>Bi isotopes (last two served as internal standards).

The ICP-MS method validation covered the evaluation of limit of detection (LOD), the limit of quantification (LOQ), trueness, precision (repeatability). Moreover, the quality control sample at the concentration level of 50 mg·L<sup>-1</sup> for Fe, and 500 mg·L<sup>-1</sup> for Au was analysed every ten samples to ensure the quality of the routinely acquired results.

Linearities of calibration curves were evaluated within a range from 10 to 2 000 µg·L<sup>-1</sup> for Fe and 100 to 10 000 µg·L<sup>-1</sup> for Au, respectively. LODs and LOQs were calculated using the equations: LOD = 3.3 SD/s and LOQ = 10 SD/s, where SD is the standard deviation of the signal intensity (standard deviation of the intercept) and s is the slope of the calibration curve. Trueness and precision were assessed by analyses of 6 independently prepared spiked samples at the concentration level of 500 µg·L<sup>-1</sup> for Fe, and 5 000 µg·L<sup>-1</sup> for Au. Calculated recoveries for Fe, and Au in repeatedly measured QC samples (n=9) were 101.7 %, 101.8 %. The validation results are summarized in Table SI-5.

**Table S5.** Validation results for ICP-MS.

| Parameter                               | Analyte    |              |
|-----------------------------------------|------------|--------------|
|                                         | Fe         | Au           |
| Calibration range [µg·L <sup>-1</sup> ] | 10 – 2 000 | 100 – 10 000 |
| Correlation coefficient                 | 0.9999     | 0.9999       |
| LOD [µg·L <sup>-1</sup> ]               | 9          | 2            |
| LOQ [µg·L <sup>-1</sup> ]               | 27         | 6            |
| Trueness [%]                            | 96.3       | 101.1        |
| Precision [%]                           | 0.6        | 0.5          |

**Table S6.** Contents of Au and Fe in many independently prepared AuBSA-Fe samples as determined by ICP-MS and calculation of Au:Fe ratios in real samples.

| Sample | [Au]<br>[mM] | [Au]<br>[mg·mL <sup>-1</sup> ] | [Fe]<br>[μM] | [Fe]<br>[μg·mL <sup>-1</sup> ] | Au:Fe |      |        |
|--------|--------------|--------------------------------|--------------|--------------------------------|-------|------|--------|
| M-8    | 3.9          | 0.8                            | 321.1        | 17.9                           | 12.2  |      |        |
| M-7    | 4.9          | 1.0                            | 359.6        | 20.1                           | 13.5  |      |        |
| M-6    | 5.9          | 1.2                            | 421.5        | 23.5                           | 14.0  |      |        |
| M-5    | 7.0          | 1.4                            | 508.8        | 28.4                           | 13.8  |      |        |
| M-4    | 8.3          | 1.6                            | 636.4        | 35.5                           | 13.1  |      |        |
| M-3    | 10.6         | 2.1                            | 750.2        | 41.9                           | 14.2  |      |        |
| M-2    | 11.7         | 2.3                            | 894.4        | 49.9                           | 13.0  |      |        |
| M-1    | 13.9         | 2.7                            | 1049.2       | 58.6                           | 13.2  |      |        |
| M1     | 10.9         | 2.2                            | 807.0        | 45.1                           | 13.6  |      |        |
| M2     | 14.0         | 2.8                            | 1020.4       | 57.0                           | 13.7  |      |        |
| M3     | 16.1         | 3.2                            | 1193.3       | 66.6                           | 13.5  |      |        |
| M4     | 17.1         | 3.4                            | 1248.5       | 69.7                           | 13.7  |      |        |
|        |              |                                |              | Average                        | 13.5  | 13.3 | Theory |
|        |              |                                |              | SD                             | 0.5   |      |        |

Note: Average Au:Fe ratio in real samples coincides well with the theoretical ratio of these metals (theoretical Au:Fe ratio derived from BSA:Au:Fe = 1:10:0.75  $\Rightarrow$  10/0.75  $\doteq$  13.3)



#### 4. MRI for AuBSA-Fe samples

**Table S7:** Values of relaxation times  $T_1$ ,  $T_2$  and relaxation rates  $R_1$ ,  $R_2$  together with real iron concentrations (as determined by ICP-MS for concentrated samples, while derived from these values for diluted samples).

| Sample | Sample concentration [%] | Fe concentration [mM] | $T_1$ [ms] | $R_1$ [ $s^{-1}$ ] | $T_2$ [ms] | $R_2$ [ $s^{-1}$ ] |
|--------|--------------------------|-----------------------|------------|--------------------|------------|--------------------|
| M-8    | 100                      | 0.321                 | 2200       | 0.455              | 835        | 1.198              |
|        | 75                       | 0.241                 | 2560       | 0.391              | 1085       | 0.922              |
|        | 50                       | 0.161                 | 2285       | 0.438              | 809.5      | 1.235              |
|        | 25                       | 0.080                 | 1490       | 0.671              | 492.2      | 2.032              |
| M-7    | 100                      | 0.360                 | 2450       | 0.408              | 787        | 1.271              |
|        | 75                       | 0.270                 | 2355       | 0.425              | 926.2      | 1.080              |
|        | 50                       | 0.180                 | 3020       | 0.331              | 1360       | 0.735              |
|        | 25                       | 0.090                 | 3390       | 0.295              | 1869.2     | 0.535              |
| M-6    | 100                      | 0.421                 | 2305       | 0.434              | 700        | 1.429              |
|        | 75                       | 0.316                 | 2570       | 0.389              | 926.2      | 1.080              |
|        | 50                       | 0.211                 | 2800       | 0.357              | 1092       | 0.916              |
|        | 25                       | 0.105                 | 3320       | 0.301              | 1765.3     | 0.566              |
| M-5    | 100                      | 0.509                 | 1970       | 0.508              | 587.6      | 1.702              |
|        | 75                       | 0.382                 | 2270       | 0.441              | 757.1      | 1.321              |
|        | 50                       | 0.254                 | 2590       | 0.386              | 973.4      | 1.027              |
|        | 25                       | 0.127                 | 3100       | 0.323              | 1579.4     | 0.633              |
| M-4    | 100                      | 0.636                 | 1820       | 0.549              | 473        | 2.114              |
|        | 75                       | 0.477                 | 2145       | 0.466              | 602.1      | 1.661              |
|        | 50                       | 0.318                 | 2635       | 0.380              | 920.4      | 1.086              |
|        | 25                       | 0.159                 | 3100       | 0.323              | 1420.8     | 0.704              |
| M-3    | 100                      | 0.750                 | 1515       | 0.660              | 364        | 2.747              |
|        | 75                       | 0.563                 | 1920       | 0.521              | 487.7      | 2.050              |
|        | 50                       | 0.375                 | 2379       | 0.420              | 704.3      | 1.420              |
|        | 25                       | 0.188                 | 2855       | 0.350              | 1151.2     | 0.869              |
| M-2    | 100                      | 0.894                 | 1515       | 0.660              | 301.1      | 3.321              |
|        | 75                       | 0.671                 | 1810       | 0.552              | 386.3      | 2.589              |
|        | 50                       | 0.447                 | 2315       | 0.432              | 629.7      | 1.588              |
|        | 25                       | 0.224                 | 2930       | 0.341              | 1003.1     | 0.997              |

**Table S7. Cont.**

|            |     |       |      |       |         |       |
|------------|-----|-------|------|-------|---------|-------|
| <b>M-1</b> | 100 | 1.049 | 1305 | 0.766 | 213.4   | 4.686 |
|            | 75  | 0.787 | 1610 | 0.621 | 331.133 | 3.020 |
|            | 50  | 0.525 | 2080 | 0.481 | 459     | 2.179 |
|            | 25  | 0.262 | 2795 | 0.358 | 889.73  | 1.124 |
| <b>M1</b>  | 100 | 0.807 | 1815 | 0.551 | 447     | 2.237 |
|            | 75  | 0.605 | 2050 | 0.488 | 593     | 1.686 |
|            | 50  | 0.404 | 2355 | 0.425 | 723     | 1.383 |
|            | 25  | 0.202 | 2780 | 0.360 | 1023    | 0.978 |
| <b>M2</b>  | 100 | 1.020 | 1655 | 0.604 | 379     | 2.639 |
|            | 75  | 0.765 | 1810 | 0.552 | 427     | 2.342 |
|            | 50  | 0.510 | 2230 | 0.448 | 638     | 1.567 |
|            | 25  | 0.255 | 2430 | 0.412 | 918     | 1.089 |
| <b>M3</b>  | 100 | 1.193 | 1365 | 0.733 | 264     | 3.788 |
|            | 75  | 0.895 | 1560 | 0.641 | 308     | 3.247 |
|            | 50  | 0.597 | 1830 | 0.546 | 479     | 2.088 |
|            | 25  | 0.298 | 2590 | 0.386 | 911     | 1.098 |
| <b>M4</b>  | 100 | 1.249 | 1271 | 0.787 | 216     | 4.630 |
|            | 75  | 0.936 | 1535 | 0.651 | 290     | 3.448 |
|            | 50  | 0.624 | 1915 | 0.522 | 442     | 2.262 |
|            | 25  | 0.312 | 2655 | 0.377 | 767     | 1.304 |

Note: Green values were excluded.

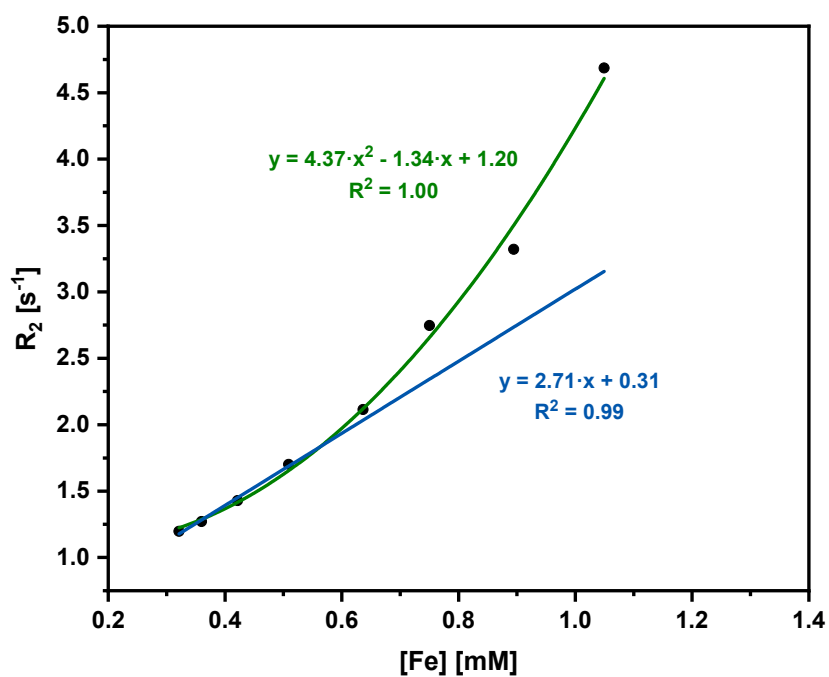

**Figure S5.** Relaxation rates as a function of iron concentration in AuBSA-Fe samples (100% concentration, any dilution is omitted). Comparison of linear and nonlinear (quadratic) fits.

Note: Quadratic fit is best suited for highly concentrated samples where the aggregation of protein occurs. Simultaneously, superparamagnetic iron oxide particles (SPIONs) attached to the protein are aggregated which may lead to the non-linear character of relaxation rate values with increasing sample concentrations.

### ***5. Ageing and storage conditions of AuBSA-Fe samples***

XPS spectra of AuBSA-Fe samples were measured shortly after their preparation (M6 in Figures SI-5) and after 1 year of ageing (M3 in Figures SI-5) at room temperature. Interestingly, in both samples only Au (0) was detected by XPS – see Figures SI-5A and SI-5B, which means that the inorganic part of the samples is not destroyed/changed. On the contrary, the relative contents of various types of organic species derived from N1s, O1s, C1s signals, varied significantly in fresh vs. aged samples – see Figures SI-5C – SI-5J. This points to a degradation of the organic part of AuBSA-Fe nanocomposites, namely a sort of oxidation takes place (based on occurrence of ammonium signal). It is highly recommended to store the samples in a fridge.

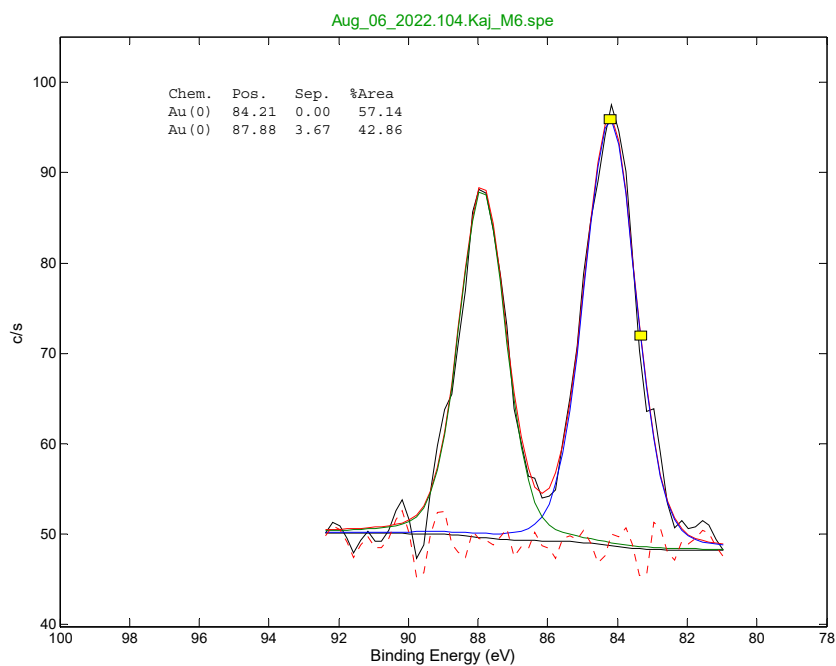

**Figure S6A.** XPS signal of fresh AuBSA-Fe sample, Au4f region.

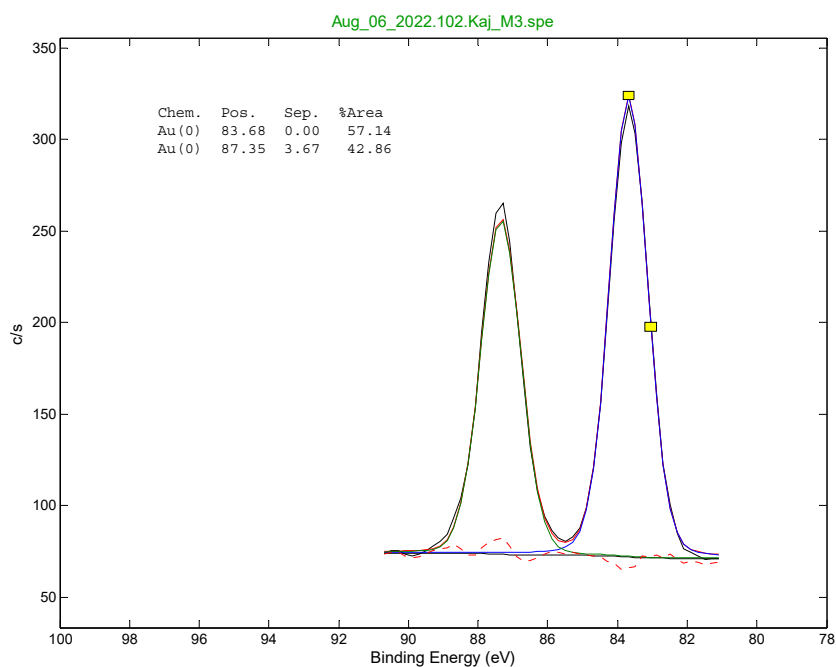

**Figure S6B.** XPS signal of one-year aged AuBSA-Fe sample, Au4f region.

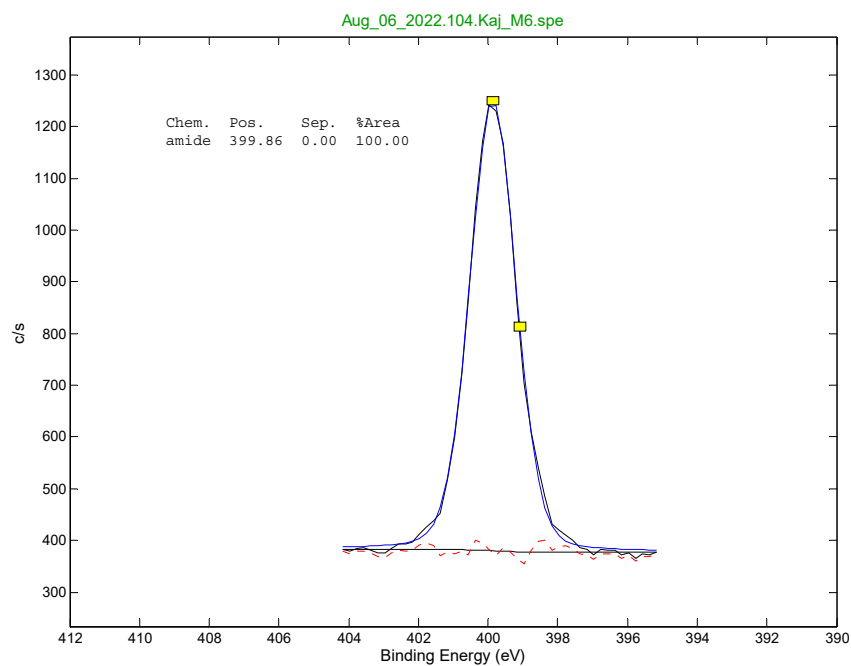

**Figure S6C.** XPS signal of fresh AuBSA-Fe sample, N1s region.

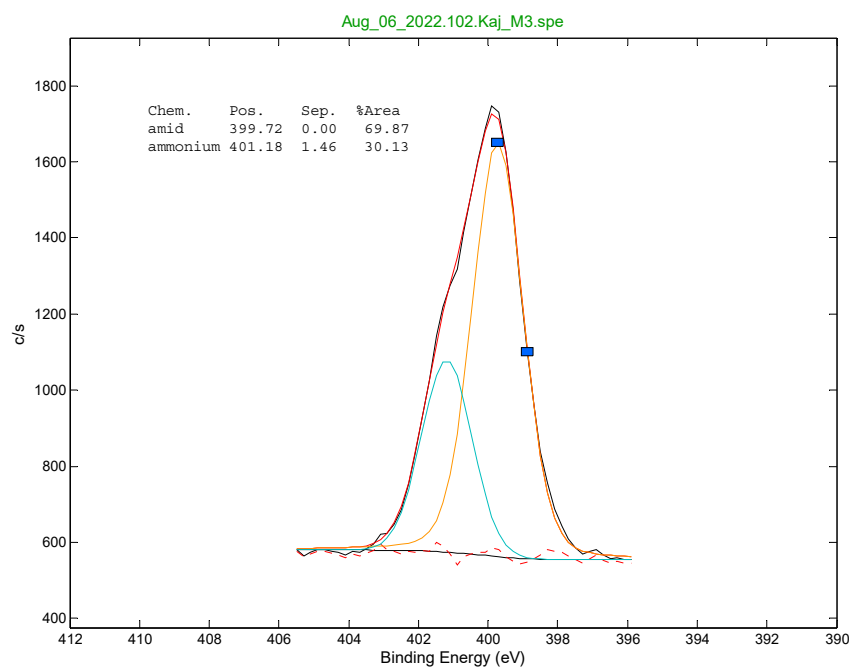

**Figure S6D.** XPS signal of one-year aged AuBSA-Fe sample, N1s region.

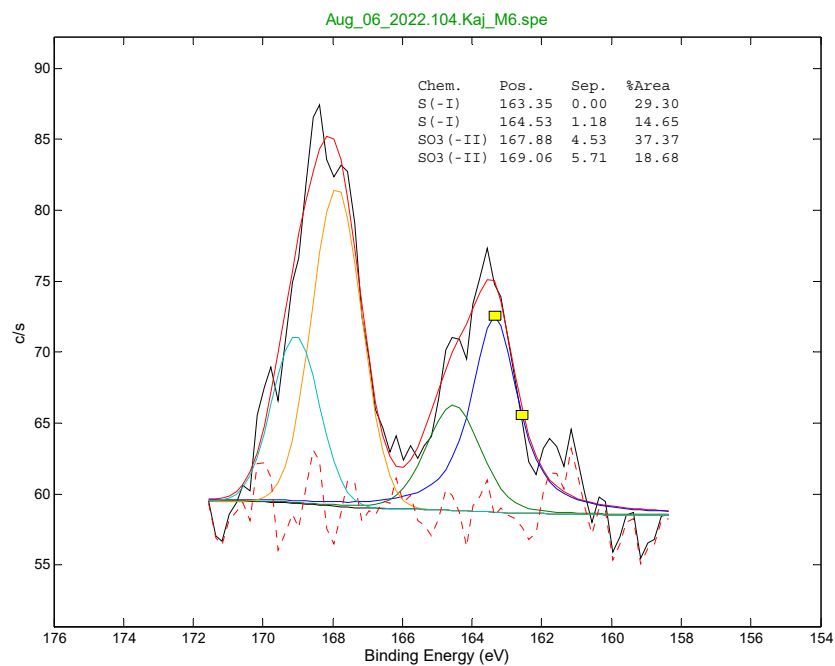

**Figure S6E.** XPS signal of fresh AuBSA-Fe sample, S2p region.

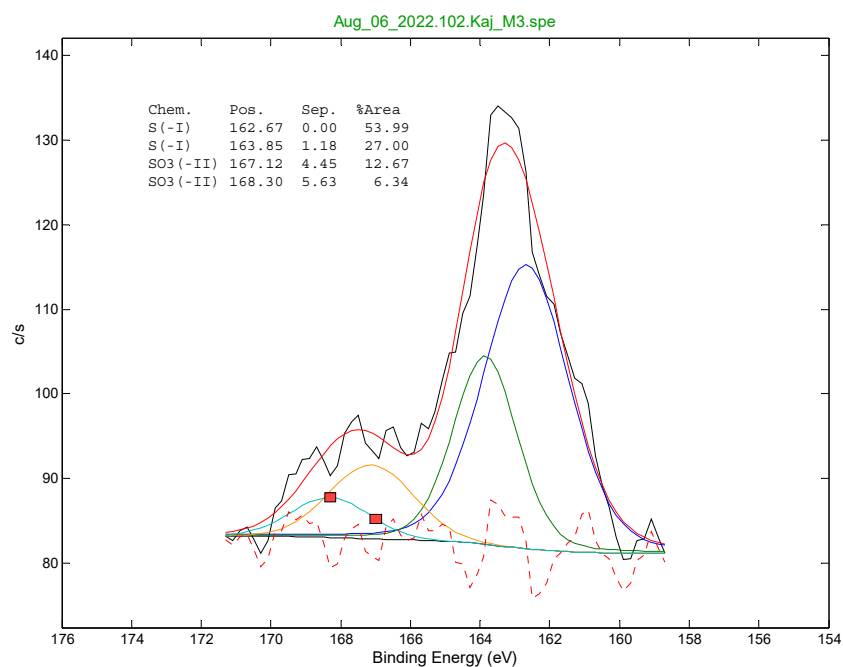

**Figure S6F.** XPS signal of one-year aged AuBSA-Fe sample, S2p region.

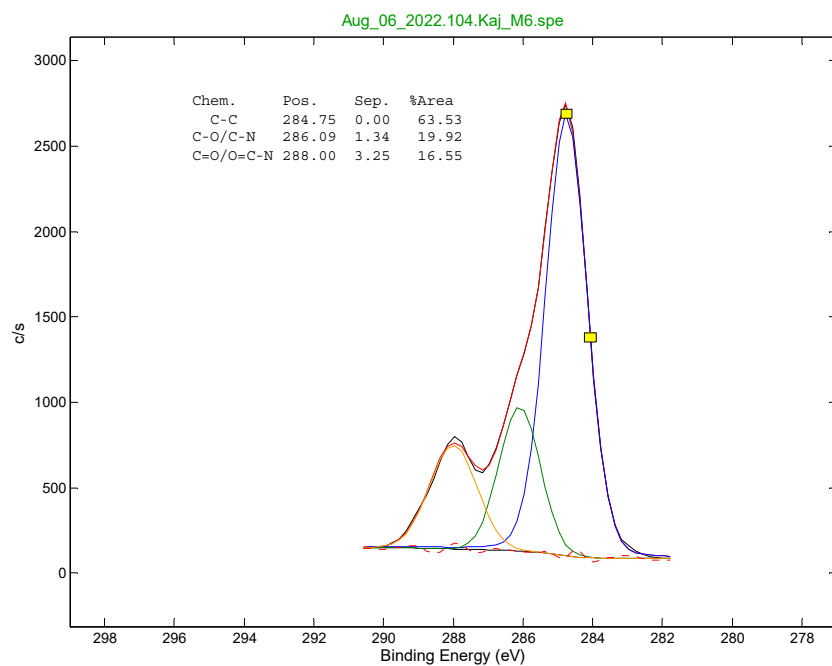

**Figure S6G.** XPS signal of fresh AuBSA-Fe sample, C1s region.

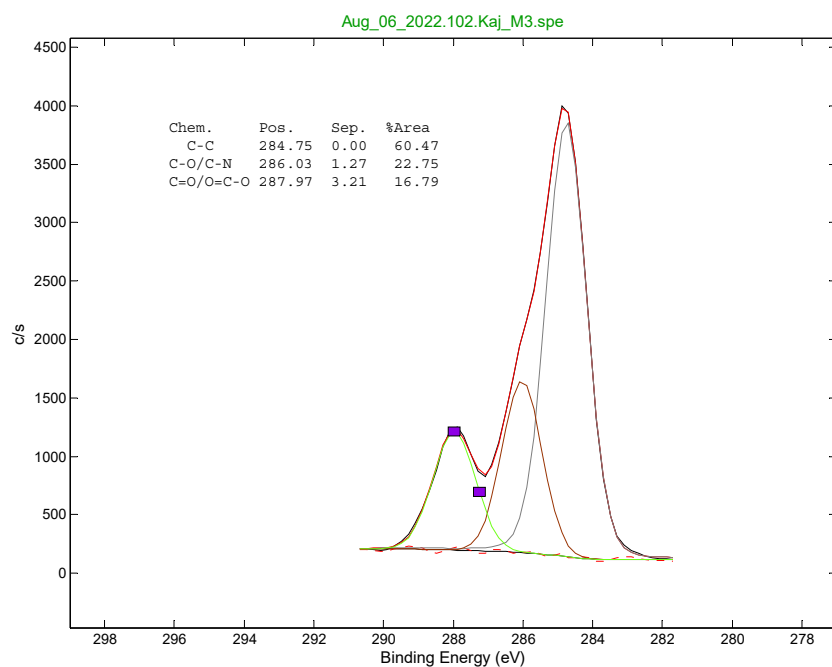

**Figure S6H.** XPS signal of one-year aged AuBSA-Fe sample, C1s region.



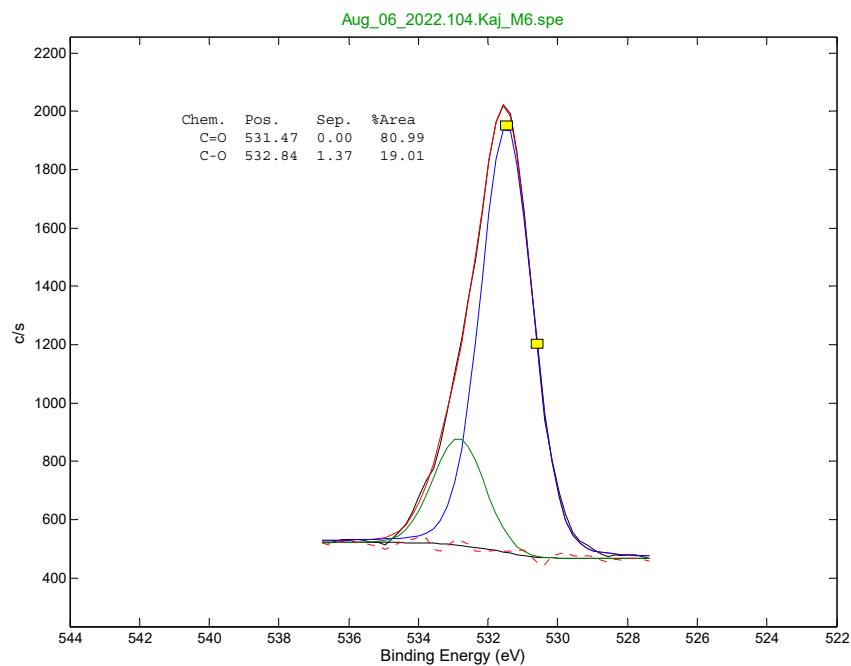

**Figure S6I.** XPS signal of fresh AuBSA-Fe sample, O1s region.

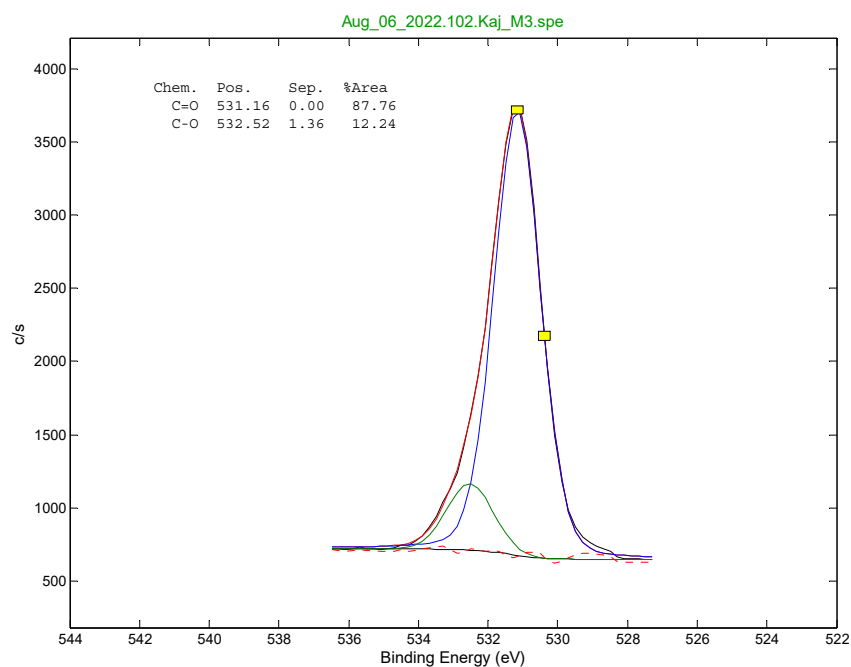

**Figure S6J.** XPS signal of one-year aged AuBSA-Fe sample, O1s region.

## 6. Cell viability tests of AuBSA-Fe nanocomposites – Alamar blue assay

**Table S8:** Table showing values of fluorescence in each well of the titration plate when cell viability tests of AuBSA-Fe nanocomposites and their precursors (HAuCl<sub>4</sub>, mixture of FeCl<sub>2</sub> and FeCl<sub>3</sub>) were performed in two representative iron concentrations (below and above 0.52 mM).

|   | 1 | 2   | 3     | 4    | 5     | 6     | 7     | 8    | 9     | 10    | 11    | 12 |
|---|---|-----|-------|------|-------|-------|-------|------|-------|-------|-------|----|
| A |   |     |       |      |       |       |       |      |       |       |       |    |
| B |   | 867 | 29735 | 2200 | 29289 | 24847 | 24735 | 1944 | 22831 | 24020 | 21247 |    |
| C |   | 835 | 30876 | 2210 | 27409 | 23349 | 23919 | 1955 | 23864 | 24412 | 23791 |    |
| D |   | 836 | 30373 | 2255 | 27282 | 23384 | 25086 | 1961 | 22664 | 24639 | 23549 |    |
| E |   | 861 | 31141 | 2407 | 20874 | 23155 | 25072 | 2278 | 794   | 25358 | 24243 |    |
| F |   | 856 | 30711 | 2354 | 20757 | 24421 | 24207 | 2288 | 801   | 25066 | 24370 |    |
| G |   | 880 | 32978 | 2283 | 16906 | 24822 | 24941 | 2318 | 791   | 24956 | 24286 |    |
| H |   |     |       |      |       |       |       |      |       |       |       |    |

|   | 1 | 2                     | 3           | 4                  | 5                                        | 6                             | 7                             | 8                                   | 9 | 10 | 11 | 12 |  |
|---|---|-----------------------|-------------|--------------------|------------------------------------------|-------------------------------|-------------------------------|-------------------------------------|---|----|----|----|--|
| A |   |                       |             |                    |                                          |                               |                               |                                     |   |    |    |    |  |
| B |   | cultivation<br>medium | RPE-1 cells | HAuCl <sub>4</sub> | FeCl <sub>2</sub> +<br>FeCl <sub>3</sub> | AuBSA-Fe<br>(c(Fe) < 0.52 mM) | AuBSA-Fe<br>(c(Fe) ≥ 0.52 mM) | The other samples<br>and precursors |   |    |    |    |  |
| C |   |                       |             |                    |                                          |                               |                               |                                     |   |    |    |    |  |
| D |   |                       |             |                    |                                          |                               |                               |                                     |   |    |    |    |  |
| E |   |                       |             | HAuCl <sub>4</sub> | FeCl <sub>2</sub> +<br>FeCl <sub>3</sub> |                               |                               |                                     |   |    |    |    |  |
| F |   |                       |             |                    |                                          |                               |                               |                                     |   |    |    |    |  |
| G |   |                       |             |                    |                                          |                               |                               |                                     |   |    |    |    |  |
| H |   |                       |             |                    |                                          |                               |                               |                                     |   |    |    |    |  |

Note: For the detection of outliers (green values), Grubbs' or Dixon's test was used.
